# Supplementary material for: Northern and southern blacklegged (deer) ticks are genetically distinct with different histories and Lyme spirochete infection rates
Source: PubMed Central journal article supplement (PMC7314838; doi:10.1038/s41598-020-67259-0), 2020-06-24
Supplement: 41598_2020_67259_MOESM2_ESM.pdf [file 41598_2020_67259_MOESM2_ESM.pdf]

Scientific Reports

Northern and southern blacklegged (deer) ticks are genetically distinct with different histories  
and Lyme spirochete infection rates

Guang Xu<sup>1\*</sup>, Ben Wielstra<sup>2,3</sup>, Stephen M. Rich<sup>1</sup>

<sup>1</sup> Department of Microbiology, University of Massachusetts, Amherst, United States of America

<sup>2</sup> Institute of Biology Leiden, Leiden University, Leiden, The Netherlands

<sup>3</sup> Naturalis Biodiversity Center, Leiden, The Netherlands

\* Corresponding author

E-mail: [gxu@umass.edu](mailto:gxu@umass.edu) (GX)

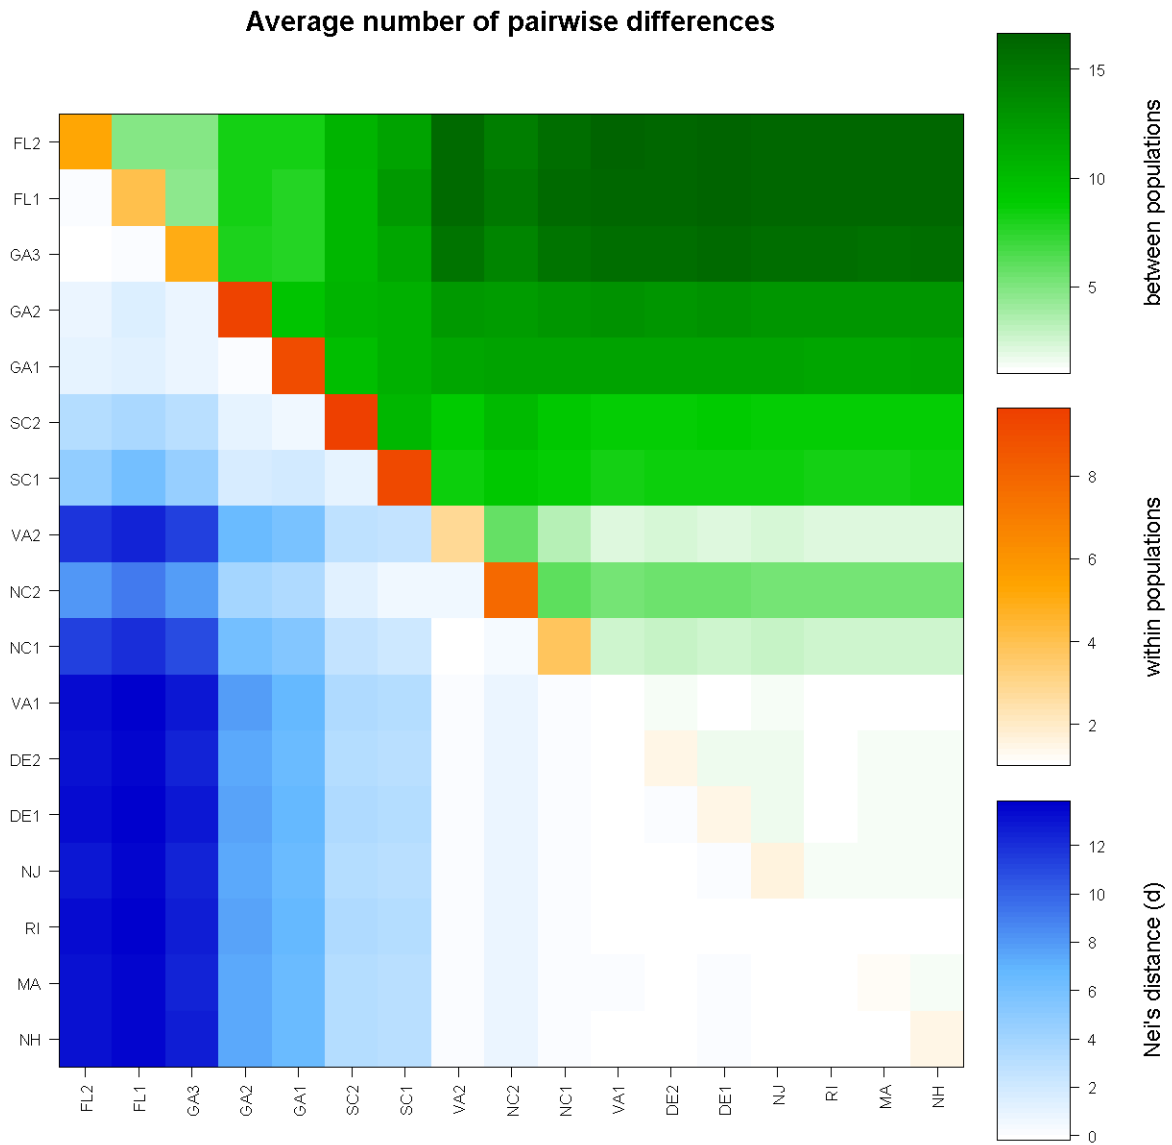

Supplementary S1 Fig A. Pairwise comparisons of 17 populations using mtDNA 16S gene.

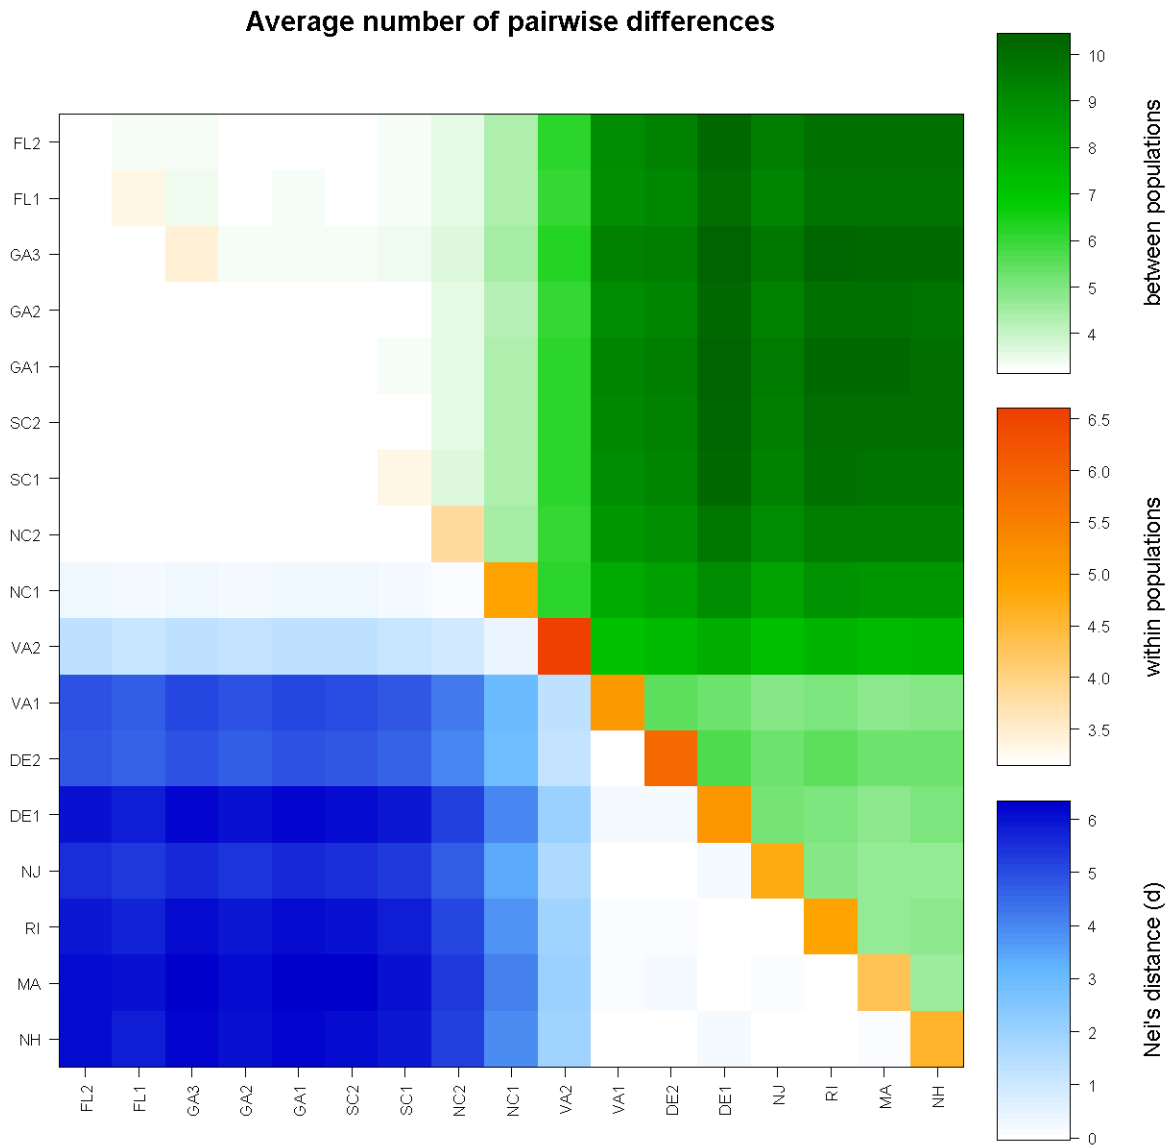

Supplementary S1 Fig B. Pairwise comparisons of 17 populations using nuclear CRT gene.

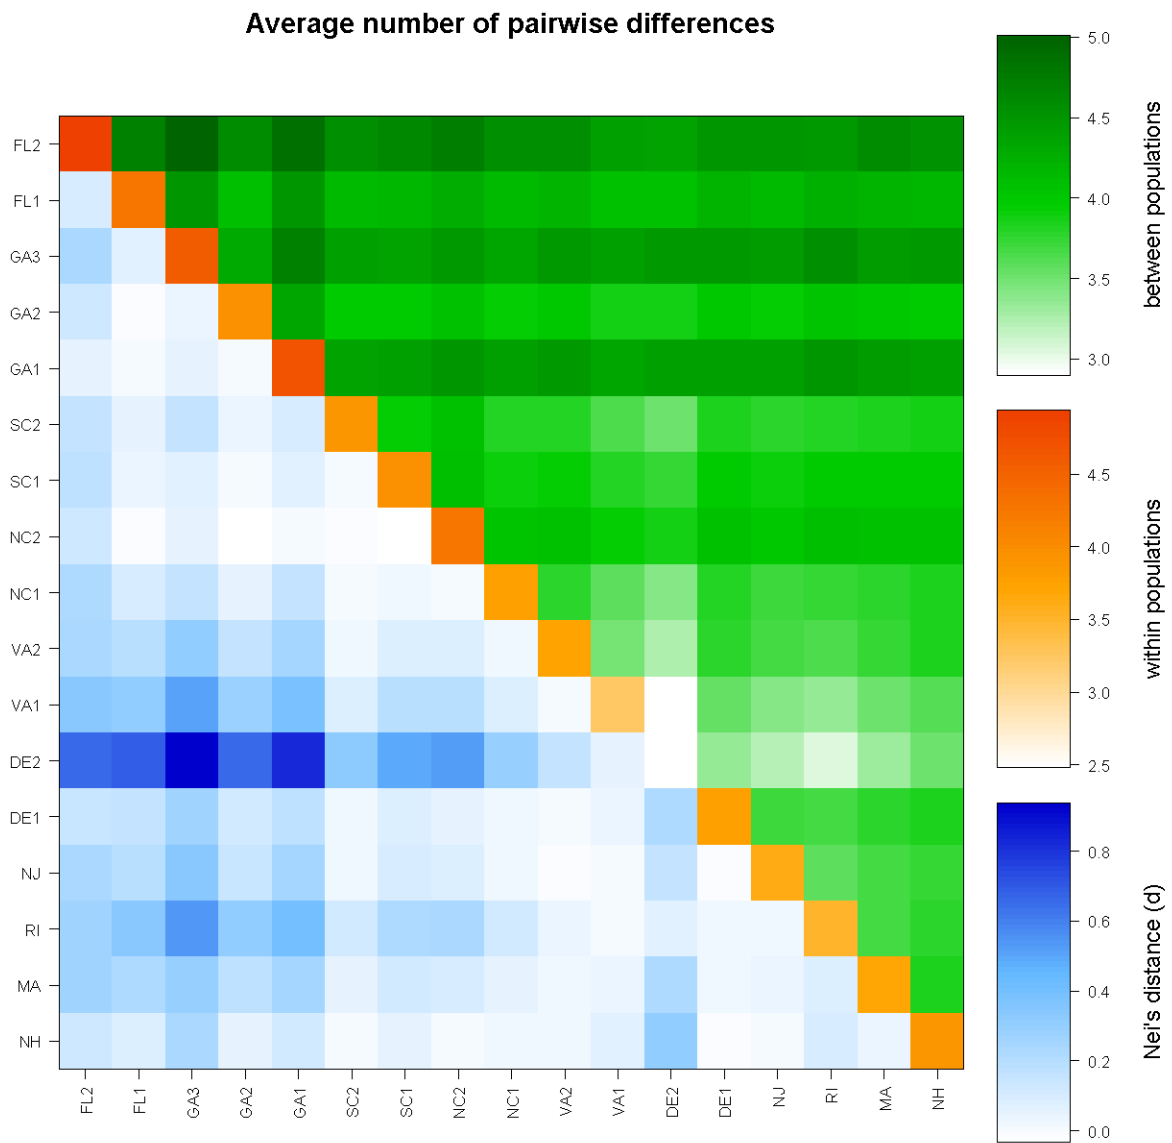

Supplementary S1 Fig C. Pairwise comparisons of 17 populations using nuclear G3PD gene.

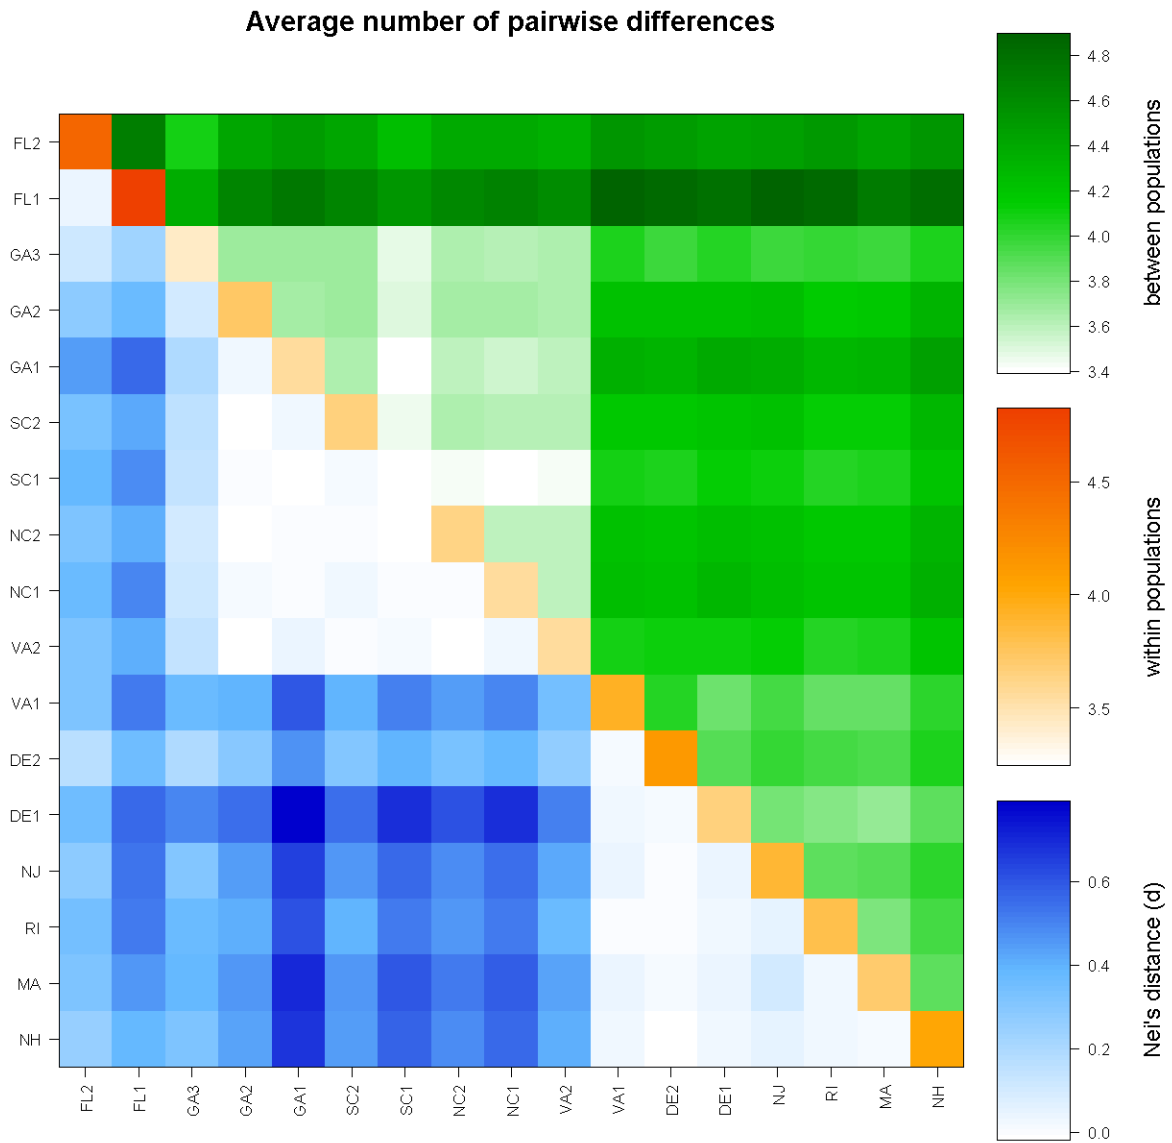

Supplementary S1 Fig D. Pairwise comparisons of 17 populations using nuclear IDH gene.

Supplementary 2 Table 1. Molecular diversity indices within the mt 16S rRNA gene for 17 *Ixodes scapularis* populations.

| Population | Theta(Hom) | Theta(K)  | Theta(S) | Theta(Pi) |
|------------|------------|-----------|----------|-----------|
| FL1        | 3.617109   | 9.184249  | 6.472691 | 4.058385  |
| FL2        | 4.111811   | 5.171673  | 5.76075  | 5.238095  |
| GA3        | 3.467574   | 6.068464  | 6.008398 | 4.97076   |
| GA2        | 4.082188   | 8.671562  | 5.638116 | 9.504386  |
| GA1        | 3.097036   | 4.211906  | 5.433937 | 9.046253  |
| SC2        | 3.650125   | 11.499964 | 6.839788 | 9.643048  |
| SC1        | 3.361519   | 11.277806 | 5.746004 | 9.19332   |
| NC2        | 10.150861  | 14.660475 | 5.757215 | 7.819355  |
| NC1        | 7.372952   | 11.987522 | 5.437542 | 3.802469  |
| VA2        | 4.678189   | 9.107343  | 5.794556 | 2.866059  |
| VA1        | 1.665445   | 2.540178  | 1.365204 | 1.000000  |
| DE2        | 2.239167   | 3.041918  | 1.625658 | 1.509881  |
| DE1        | 2.720205   | 3.467044  | 1.676824 | 1.429429  |
| NJ         | 4.286126   | 6.289422  | 2.923151 | 1.546971  |
| RI         | 1.359705   | 2.735013  | 1.396098 | 1.016246  |
| MA         | 1.469944   | 2.333035  | 1.591806 | 1.207387  |
| NH         | 3.467415   | 6.653496  | 2.387709 | 1.42052   |

Supplementary 2 Table 2. Analysis of molecular variance comparing between and within north and south population of *Ixodes scapularis*.

| Source of variation                      | df   | Sum of Squares | F(prob)    | Variance | %     |
|------------------------------------------|------|----------------|------------|----------|-------|
| CRT                                      |      |                |            |          |       |
| Between North and South                  | 1    | 29.503         | 0.04898*** | 0.02661  | 5.33  |
| Among collections within North and South | 15   | 19.364         | 0.01124*** | 0.00600  | 1.20  |
| Within collection                        | 2427 | 1131.604       | 0.05967*** | 0.46626  | 93.46 |
| G3PD                                     |      |                |            |          |       |
| Between North and South                  | 1    | 8.278          | 0.01406*** | 0.00574  | 1.41  |
| Among collections within North and South | 15   | 15.521         | 0.01406*** | 0.00473  | 1.16  |
| Within collection                        | 2407 | 958.342        | 0.02562*** | 0.39815  | 97.44 |
| IDH                                      |      |                |            |          |       |
| Between North and South                  | 1    | 17.334         | 0.02750*** | 0.01253  | 2.57  |
| Among collections within North and South | 15   | 22.974         | 0.01647*** | 0.00782  | 1.60  |
| Within collection                        | 2435 | 1137.459       | 0.04175*** | 0.46713  | 95.83 |

---

16S

---

|                            |   |        |            |         |      |
|----------------------------|---|--------|------------|---------|------|
| Between North<br>and South | 1 | 16.297 | 0.05315*** | 0.02397 | 5.31 |
|----------------------------|---|--------|------------|---------|------|

---

|                                                   |    |        |            |         |      |
|---------------------------------------------------|----|--------|------------|---------|------|
| Among<br>collections<br>within North<br>and South | 15 | 34.774 | 0.06491*** | 0.02771 | 6.15 |
|---------------------------------------------------|----|--------|------------|---------|------|

---

|                      |      |         |            |         |       |
|----------------------|------|---------|------------|---------|-------|
| Within<br>collection | 1215 | 485.076 | 0.11461*** | 0.39924 | 88.54 |
|----------------------|------|---------|------------|---------|-------|

---

\*\*\* P<0.0001



Supplementary 2 Table 3. Demographic Parameters based on 16S, CRT, G3PD and IDH genes.

|     | 16S    |       |       | CRT   |       |       | G3PD  |       |       | IDH   |       |       |
|-----|--------|-------|-------|-------|-------|-------|-------|-------|-------|-------|-------|-------|
|     | Tau    | Theta | SSD   | Tau   | Theta | SSD   | Tau   | Theta | SSD   | Tau   | Theta | SSD   |
| FL2 | 2.890  | 0.019 | 0.025 | 0.305 | 0.00  | 0.003 | 5.744 | 0.004 | 0.048 | 5.880 | 0.000 | 0.003 |
| FL1 | 0.000  | 0.000 | 0.806 | 1.474 | 0.868 | 0.006 | 6.836 | 0.000 | 0.031 | 5.955 | 0.002 | 0.008 |
| GA3 | 0.000  | 0.000 | 0.800 | 2.594 | 0.986 | 0.000 | 5.961 | 0.004 | 0.026 | 2.770 | 0.000 | 0.011 |
| GA2 | 18.537 | 0.002 | 0.063 | 1.824 | 0.000 | 0.036 | 5.598 | 0.000 | 0.038 | 2.441 | 1.380 | 0.003 |
| GA1 | 18.758 | 0.000 | 0.096 | 2.979 | 0.000 | 0.000 | 5.607 | 0.000 | 0.021 | 1.722 | 0.000 | 0.063 |
| SC2 | 18.633 | 0.002 | 0.102 | 2.313 | 0.766 | 0.000 | 5.938 | 0.005 | 0.056 | 2.561 | 1.385 | 0.000 |
| SC1 | 17.711 | 0.002 | 0.078 | 1.709 | 0.000 | 0.061 | 5.855 | 0.000 | 0.051 | 2.184 | 1.266 | 0.001 |
| NC2 | 1.869  | 0.000 | 0.059 | 1.039 | 0.000 | 0.145 | 5.555 | 0.000 | 0.050 | 2.609 | 1.534 | 0.006 |
| NC1 | 1.400  | 0.869 | 0.004 | 1.335 | 0.000 | 0.147 | 6.211 | 0.000 | 0.040 | 3.313 | 0.445 | 0.001 |
| VA2 | 2.016  | 0.000 | 0.002 | 7.168 | 1.276 | 0.003 | 6.406 | 0.000 | 0.040 | 2.871 | 0.863 | 0.000 |
| VA1 | 1.063  | 0.025 | 0.006 | 4.414 | 2.257 | 0.006 | 6.678 | 0.000 | 0.041 | 4.203 | 0.193 | 0.002 |
| DE2 | 1.969  | 0.004 | 0.023 | 7.547 | 0.139 | 0.005 | 0.000 | 0.000 | 0.394 | 4.406 | 0.002 | 0.007 |
| DE1 | 1.344  | 0.000 | 0.006 | 7.133 | 0.000 | 0.003 | 6.125 | 0.000 | 0.029 | 4.559 | 0.000 | 0.004 |
| NJ  | 1.705  | 0.000 | 0.006 | 4.969 | 1.218 | 0.005 | 6.184 | 0.000 | 0.034 | 4.508 | 0.000 | 0.004 |
| RI  | 1.064  | 0.000 | 0.002 | 6.568 | 0.007 | 0.006 | 7.396 | 0.002 | 0.060 | 3.973 | 0.000 | 0.003 |
| MA  | 1.787  | 0.000 | 0.014 | 5.969 | 0.000 | 0.011 | 6.094 | 0.000 | 0.057 | 3.947 | 0.005 | 0.001 |

|    |       |       |       |       |       |       |       |       |       |       |       |       |
|----|-------|-------|-------|-------|-------|-------|-------|-------|-------|-------|-------|-------|
| NH | 1.549 | 0.000 | 0.005 | 5.640 | 0.638 | 0.008 | 5.844 | 0.000 | 0.034 | 4.355 | 0.007 | 0.004 |
|----|-------|-------|-------|-------|-------|-------|-------|-------|-------|-------|-------|-------|

---

Parameters tau is time since expansion expressed in units of mutational time; theta is time

before and after population expansion; SSD means Sum of Squared deviation.

Supplementary 2 Table 4. Variable importance for the Ecological niche model

|          | South                   | South                     | North                   | North                     | North+South<br>(All)    | North+South<br>(All)      |
|----------|-------------------------|---------------------------|-------------------------|---------------------------|-------------------------|---------------------------|
| Variable | Percent<br>contribution | Permutation<br>importance | Percent<br>contribution | Permutation<br>importance | Percent<br>contribution | Permutation<br>importance |
| bio_2    | 4.8                     | 3.5                       | 5.5                     | 16.8                      | 10.6                    | 14.7                      |
| bio_8    | 7.1                     | 3.1                       | 20.4                    | 15.3                      | 10.5                    | 10                        |
| bio_9    | 37.2                    | 71.1                      | 17.8                    | 22.9                      | 5.5                     | 21.3                      |
| bio_17   | 0.9                     | 1.8                       | 41.6                    | 41.4                      | 47.3                    | 16.1                      |
| bio_16   | 50.1                    | 20.6                      | 14.7                    | 3.6                       | 26.1                    | 38                        |

BIO2 = Mean Diurnal Range (Mean of monthly (max temp - min temp))

BIO8 = Mean Temperature of Wettest Quarter

BIO9 = Mean Temperature of Driest Quarter

BIO16 = Precipitation of Wettest Quarter

BIO17 = Precipitation of Driest Quarter
